# Supplementary material
Source: PubMed Central journal article supplement (PMC6085990)
Supplement: blood828418-suppl1.pdf [file blood828418-suppl1.pdf]

## Supplemental Data

- **Supplementary Methods**
- **Supplementary References**
- **Supplementary Figures 1-4**
- **Supplementary Tables 1-4**

### **CK1 $\alpha$ and IRF4 are Essential and Independent Effectors of Immunomodulatory Drugs in Primary Effusion Lymphoma**

Ajinkya Patil<sup>1</sup>, Mark Manzano<sup>1</sup>, and Eva Gottwein<sup>1</sup>

<sup>1</sup>Department of Microbiology-Immunology, Feinberg School of Medicine, Northwestern University, Chicago, Illinois, 60611 USA

**Short Title:** CK1 $\alpha$  and IRF4 are IMiD effectors in PEL

#### **Corresponding Author:**

Eva Gottwein, Department of Microbiology-Immunology, Northwestern University  
Feinberg School of Medicine, 320 E Superior St., Searle Bldg., Room 3-525  
Chicago, Illinois 60611, USA  
e-mail address: [e-gottwein@northwestern.edu](mailto:e-gottwein@northwestern.edu)

## Supplementary Methods

### Vector design and cloning procedures

For sgRNA sequences and primers see Table S1, other primers and synthetic DNAs Table S2, and shRNA target and hairpin sequences Table S3. sgRNAs were designed using published parameters<sup>1</sup> and inserted into BsmBI sites of pLenti-guide puro<sup>2</sup> (Addgene # 52963) or pLenti SpBsmBI sgRNA Hygro<sup>3</sup> (Addgene # 62205). sgAAVS1, sgIRF4 or sgPSMD1 are published controls<sup>4-6</sup>.

Lentiviral miR-30-embedded shRNA expression cassettes were designed using shERWOOD<sup>7</sup>, synthesized as dsDNA fragments by Epoch Life Sciences, TX, and inserted between NotI and MluI sites of pZIP-hCMV-ZsGreen-P2A-Puro-NT4 using Gibson Assembly. pZIP-hCMV-ZsGreen-P2A-Puro-NT4 is derived from pZIP-hCMV-ZsGreen-Puro-NT control #4 (Transomic Technologies, AL), but was modified to replace the internal ribosomal entry site (IRES) between ZsGreen and the puromycin resistance gene with a P2A peptide. The P2A-Puro<sup>R</sup> sequence was amplified from pLenti-CRISPRv2 (Addgene # 52961) with primers p2apuro\_F and p2apuro\_R and inserted between the EcoRI and BamHI sites of pZIP-hCMV-ZSGreen-Puro-NT control #4 using Gibson Assembly.

Lentiviral CK1 $\alpha$  expression vectors were based on the plasmids pLCE-P2A-Puro or pLC/ZsGreen-P2A-Blast. To construct pLCE-P2A-Puro, a P2A-Puro<sup>R</sup> fragment was PCR amplified from lentiCRISPRv2<sup>2</sup> with primers 3164 and 3158 and inserted into XhoI-digested pLCE<sup>8</sup> using Gibson assembly. This strategy created a continuous eGFP-P2A-Puro<sup>R</sup> coding sequence. To construct pLC/ZsGreen-P2A-Blast, PCR fragments generated using primers 3883/3885 (CMV promoter), 3888/3887 (ZsGreen-p2A) and 3910/3911 (P2A-Blast<sup>R</sup>) were Gibson assembled with the large BamHI/EcoRI fragment of pLCE. This strategy created a continuous ZsGreen-P2A-Blast<sup>R</sup> coding sequence. To insert the CK1 $\alpha$  coding sequence into pLC-P2A-Puro, the CMV-eGFP cassette of pLCE-P2A-Puro was excised using BamHI and replaced with fragments containing the CMV promoter (amplified using primers 3592 and 3660) and the WT CK1 $\alpha$  coding sequence (amplified using primers 3661 and 3734, which also introduce an N-terminal

Flag tag), using Gibson Assembly. G40N mutant CK1 $\alpha$  was made by overlap PCR using mutant primers 3595 and 3596. To generate pLC-CK1 $\alpha$ /G40N-P2A-Blast, pLC/ZsGreen-P2A-Blast was digested with AgeI and BamHI to remove ZsGreen and subjected to Gibson Assembly with a PCR product encoding CK1 $\alpha$  (amplified using primers 3971 and 3734).

A newly constructed Dox-inducible lentiviral vector called pCW-MCS-puro was used for insertion of the IRF4 coding sequence. This vector was derived from pCW-Cas9<sup>5</sup> (Addgene plasmid # 50661) in several steps. First, a cloning linker and the human PGK promoter were amplified from gBlock 3035\_MCS\_hPGK (IDT, Coralville, IA) using primers 3224 and 3225, cut using NheI and XbaI and used to replace the equivalent sequence (containing Cas9-PGK promoter-Puro<sup>R</sup>) of pCW-Cas9. Primer 3225 also introduces a P2A peptide sequence. The resulting vector (pCW-MCS-PGK-P2A) was linearized using BamHI and used for insertion of a puro resistance marker, amplified from pLenti-guide puro<sup>2</sup> using primers 2402 and 3309, by Gibson Assembly. The resulting vector was called pCW-MCS-puro and contains the following components from 5' to 3': Dox-inducible minimal CMV promoter, cloning linker, human PGK promoter, Puro<sup>R</sup>-P2A-rTTA3 cassette. Finally, an IRF4 coding sequence containing several silent mutations, introduced as part of another study, was PCR amplified from IRF4\_gBLOCK using primers 3672 and 3673 and inserted into the NheI site contained in the cloning linker of pCW-MCS-PGK-P2A-puro using Gibson Assembly. All plasmids and PCR amplified inserts were confirmed by Sanger sequencing.

## Supplementary References

1. Doench JG, Fusi N, Sullender M, et al. Optimized sgRNA design to maximize activity and minimize off-target effects of CRISPR-Cas9. *Nat Biotechnol.* 2016;34(2):184-191.
2. Sanjana NE, Shalem O, Zhang F. Improved vectors and genome-wide libraries for CRISPR screening. *Nat Methods.* 2014;11(8):783-784.

3. Pham H, Kearns NA, Maehr R. Transcriptional Regulation with CRISPR/Cas9 Effectors in Mammalian Cells. *Methods Mol Biol.* 2016;1358:43-57.
4. Manzano M, Patil A, Waldrop A, Dave S, Behdad A, Gottwein E. Gene Essentiality Landscape and Druggable Oncogenic Dependencies in Herpesviral Primary Effusion Lymphoma. *Nature Communications, in press.* 2018.
5. Wang T, Wei JJ, Sabatini DM, Lander ES. Genetic screens in human cells using the CRISPR-Cas9 system. *Science.* 2014;343(6166):80-84.
6. Hart T, Chandrashekar M, Aregger M, et al. High-Resolution CRISPR Screens Reveal Fitness Genes and Genotype-Specific Cancer Liabilities. *Cell.* 2015;163(6):1515-1526.
7. Knott SRV, Maceli A, Erard N, et al. A computational algorithm to predict shRNA potency. *Mol Cell.* 2014;56(6):796-807.
8. Zhang J, Jima DD, Jacobs C, et al. Patterns of microRNA expression characterize stages of human B-cell differentiation. *Blood.* 2009;113(19):4586-4594.

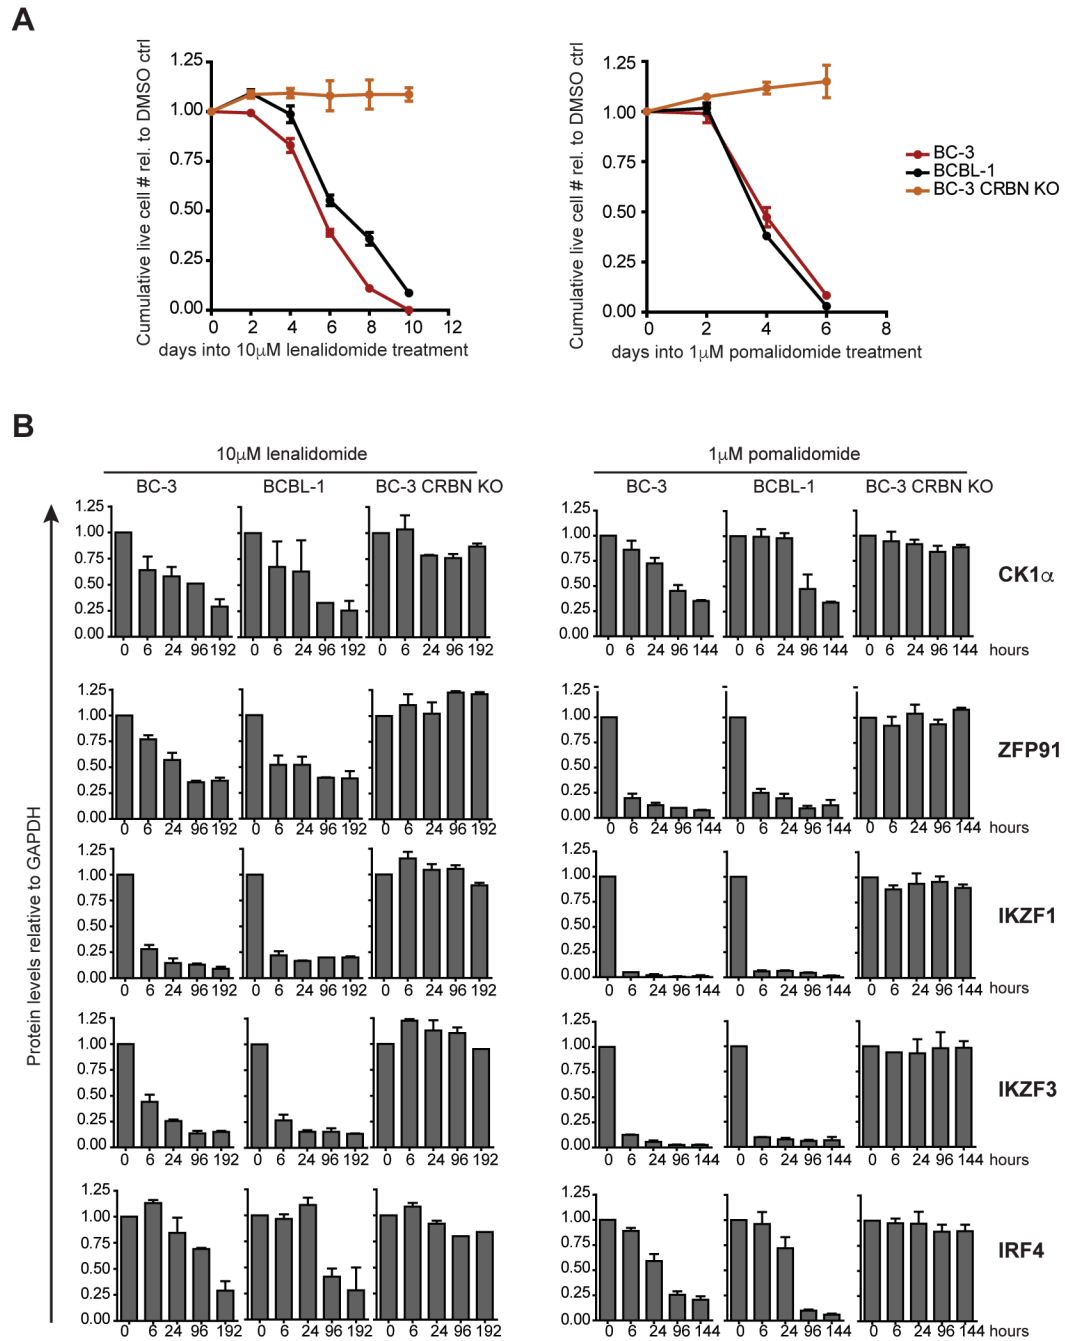

**Fig. S1 Treatment of PEL cell lines with lenalidomide and pomalidomide leads to toxicity and degradation of neosubstrates IKZF1, IKZF3, ZFP91 and CK1α in a CRBN dependent manner.** (A) Growth curve analyses of samples described in Fig. 2B, C (n=3, error bars SEM). (B) Quantitative analysis of Western Blots shown in Figs. 2B and C (n=2, error bars SEM).

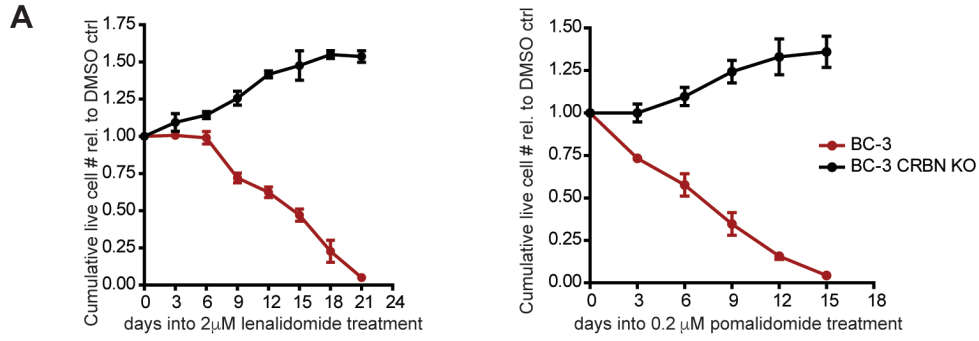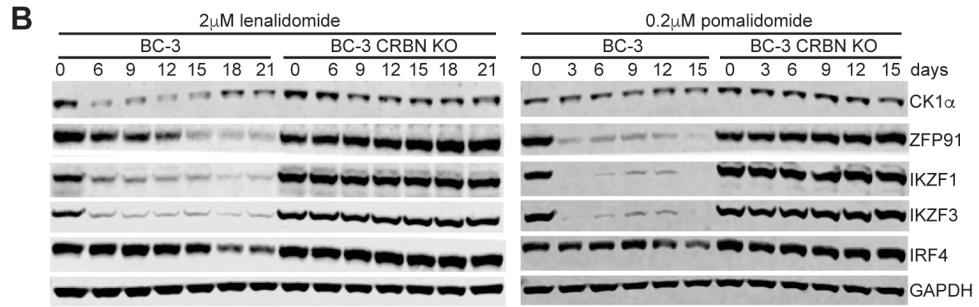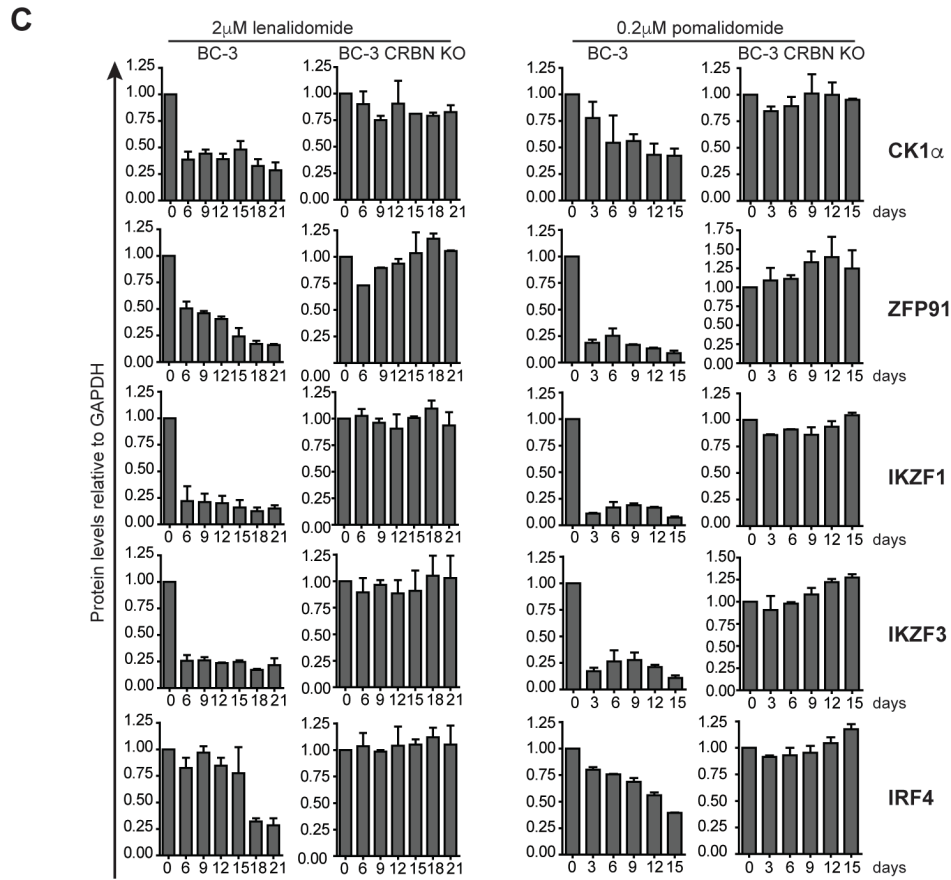

**Fig. S2 Lower concentrations of lenalidomide and pomalidomide are toxic and reduce neosubstrate and IRF4 expression.** (A) Growth curve analyses of BC-3 or BC3 CRBN KO cells treated with 2 $\mu$ M lenalidomide or 0.2  $\mu$ M pomalidomide (n=3, error bars SEM). (B) Representative quantitative Western blot analysis of CK1 $\alpha$ , ZFP91, IKZF1, IKZF3, and IRF4 expression at the indicated time points in hours (hrs) following treatment of BC-3, or BC-3 CRBN KO cells with 2 $\mu$ M lenalidomide 0.2 $\mu$ M pomalidomide GAPDH served as loading control. (C) Quantitative analysis of the data shown in Fig. S2B over two replicates (n=2, error bars SEM).

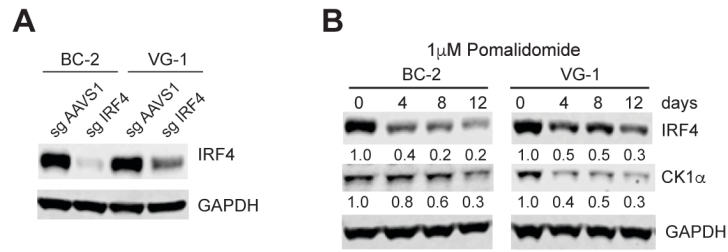

**Fig. S3 Pomalidomide treatment of BC-2 and VG-1 leads to loss of IRF4 expression.** (A) Quantitative Western Blotting confirms loss of IRF4 expression following delivery of sgIRF4 into BC-2 or VG-1 (see Fig. 3A, where sgIRF4 served as a positive control). (B) Treatment of BC-2 and VG-1 cells with 1 $\mu$ M pomalidomide leads reduced IRF4 and CK1 $\alpha$  expression. Numbers below the panels indicate relative expression.



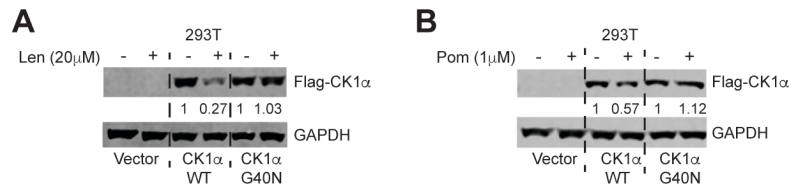

**Fig. S4 G40N mutant CK1 $\alpha$  is resistant to IMiD-induced degradation.** 293T cells were transfected with either empty vector or lentiviral vectors expressing Flag-tagged WT or G40N mutant CK1 $\alpha$ . Cells were treated for 4 days with the indicated amounts of lenalidomide (A) or pomalidomide (B) before analysis. GAPDH served as loading control.

| sgRNA            | Sequence              | Vector                        | Forward Primer               | Reverse Primer              |
|------------------|-----------------------|-------------------------------|------------------------------|-----------------------------|
| <b>AAVS1</b>     | GGGCCACTAGGGACAGGAT   | pLenti-guide puro             | CACCGGGGCCACTAGGGACAGGAT     | AAACATCCTGTCCCTAGTGGCCCC    |
| <b>CRBN sg1</b>  | ACCAATGTTTCATATAAATGG | pLenti SpBsmBI<br>sgRNA Hygro | ACACCGACCAATGTTTCATATAAATGGG | AAAACCCATTTATATGAACATTGGTCG |
| <b>CK1α sg1</b>  | TTGCTCTCGTACAGCAACTG  | pLenti-guide puro             | CAACGTTGCTCTCGTACAGCAACTG    | AAACCAGTTGCTGTACGAGAGCAAC   |
| <b>CK1α sg2</b>  | CGCCAAATAGATGTCCCCGA  | pLenti-guide puro             | CAACGCGCCAAATAGATGTCCCCGA    | AAACTCGGGGACATCTATTTGGCGC   |
| <b>IKZF1 sg1</b> | TCCAAGAGTGACAGAGTCGT  | pLenti SpBsmBI<br>sgRNA Hygro | ACACCGTCCAAGAGTGACAGAGTCGTG  | AAAACACGACTCTGTCACTCTTGGACG |
| <b>IKZF1 sg1</b> | TCCAAGAGTGACAGAGTCGT  | pLenti-guide puro             | CACCGTCCAAGAGTGACAGAGTCGT    | AAACACGACTCTGTCACTCTTGGAC   |
| <b>IKZF1 sg2</b> | GAAAATGAATGGCTCCCACA  | pLenti-guide puro             | CACCGAAAATGAATGGCTCCCACA     | AAACTGTGGGAGCCATTCATTTTC    |
| <b>IKZF3 sg1</b> | AAGATGAACTGCGATGTGTG  | pLenti-guide puro             | CACCGAAGATGAACTGCGATGTGTG    | AAACCACACATCGCAGTTCATCTTC   |
| <b>IKZF3 sg2</b> | CAAGCAGAGAAGTTCCTTG   | pLenti-guide puro             | CACCGCAAGCAGAGAAGTTCCTTG     | AAACCAAGGGAATTCTCTGCTTGC    |
| <b>IRF4 sg1</b>  | CTGATCGACCAGATCGACAG  | pLenti-guide puro             | CACCGCTGATCGACCAGATCGACAG    | AAACCTGTCGATCTGGTTCGATCAGC  |
| <b>ZFP91 sg1</b> | GCTGCATCTAGACCTAGCCG  | pLenti-guide puro             | CACCGGCTGCATCTAGACCTAGCCG    | AAACCGGCTAGGTCTAGATGCAGCC   |
| <b>ZFP91 sg2</b> | AGGCCGAGTATCCCCGCCGG  | pLenti-guide puro             | CACCGAGGCCGAGTATCCCCGCCGG    | AAACCCGGCGGGGATACTCGGCCTC   |

**Table S1. sgRNA sequences and sgRNA primers used in this study.**

| <b>Primers used to clone pZIP-CMV-ZsGreen-P2A-Puro</b>      |                                                                                                                                                                                                                                                                                                                                                                                                       |
|-------------------------------------------------------------|-------------------------------------------------------------------------------------------------------------------------------------------------------------------------------------------------------------------------------------------------------------------------------------------------------------------------------------------------------------------------------------------------------|
| <b>Name</b>                                                 | <b>Sequence</b>                                                                                                                                                                                                                                                                                                                                                                                       |
| <b>p2apuro_F</b>                                            | CACGCCATCGCCTCCGGCTCCGCCTTGCCCGGATCCGGCGCAACAACTT                                                                                                                                                                                                                                                                                                                                                     |
| <b>p2apuro_R</b>                                            | CCTCATTCAAACAGGATCCATTGCGGCCGCTCAGGCACCGGGCTTGCGG                                                                                                                                                                                                                                                                                                                                                     |
| <b>dsDNA fragments for shRNAs targeting IKZF1 and IKZF3</b> |                                                                                                                                                                                                                                                                                                                                                                                                       |
| <b>Name</b>                                                 | <b>Sequence</b>                                                                                                                                                                                                                                                                                                                                                                                       |
| <b>IKZF1 sh1</b>                                            | GCCCGGTGCCTGAGCGGCCGCAATGGATCCTGTTTGAATGAGGCTTCAGTACTTTACAGAATCGTTGCCTGCACATCTTGAAACACTTGCTGGGATTACTTCTTCAGGTTAACCCAACAGAAGGCTCGAGAAGGTATATTGCTGTTGACAGTGAGCGCGCTACGAGAAGGAGAACGAAATAGTGAAGCCACAGATGTATTTCTCCTTCTCGTAGCTTGCCTACTGCCTCGGACTTCAAGGGGCTACTTTAGGAGCAATTATCTTGTTTACTAAACTGAATACCTTGCTATCTCTTTGATACATTTTTACAAAGCTGAATTAATGGTATAAATTAATCACTTTAGCTTGCAGATCTACGCGTGGCGCGCTGGAACAATCAACCTCT     |
| <b>IKZF1 sh2</b>                                            | GCCCGGTGCCTGAGCGGCCGCAATGGATCCTGTTTGAATGAGGCTTCAGTACTTTACAGAATCGTTGCCTGCACATCTTGAAACACTTGCTGGGATTACTTCTTCAGGTTAACCCAACAGAAGGCTCGAGAAGGTATATTGCTGTTGACAGTGAGCGAGCAGCGGTCTCATCTACCTGATAGTGAAGCCACAGATGTATCAGGTAGATGAGACCGCTGCGTGCCTACTGCCTCGGACTTCAAGGGGCTACTTTAGGAGCAATTATCTTGTTTACTAAACTGAATACCTTGCTATCTCTTTGATACATTTTTACAAAGCTGAATTAATGGTATAAATTAATCACTTTAGCTTGCAGATCTACGCGTGGCGCGCTGGAACAATCAACCTCT |
| <b>IKZF3 sh1</b>                                            | GCCCGGTGCCTGAGCGGCCGCAATGGATCCTGTTTGAATGAGGCTTCAGTACTTTACAGAATCGTTGCCTGCACATCTTGAAACACTTGCTGGGATTACTTCTTCAGGTTAACCCAACAGAAGGCTCGAGAAGGTATATTGCTGTTGACAGTGAGCGAAAATCCCTTACAGCTATTCAATAGTGAAGCCACAGATGTATTGAATAGCTGTAAGGGATTTCTGCCTACTGCCTCGGACTTCAAGGGGCTACTTTAGGAGCAATTATCTTGTTTACTAAACTGAATACCTTGCTATCTCTTTGATACATTTTTACAAAGCTGAATTAATGGTATAAATTAATCACTTTAGCTTGCAGATCTACGCGTGGCGCGCTGGAACAATCAACCTCT |
| <b>IKZF3 sh2</b>                                            | GCCCGGTGCCTGAGCGGCCGCAATGGATCCTGTTTGAATGAGGCTTCAGTACTTTACAGAATCGTTGCCTGCACATCTTGAAACACTTGCTGGGATTACTTCTTCAGGTTAACCCAACAGAAGGCTCGAGAAGGTATATTGCTGTTGACAGTGAGCGGAACGCCAGAATCACATCTAATAGTGAAGCCACAGATGTATTAGATGTGATTCTGGCGTTCTTGCTACTGCCTCGGACTTCAAGGGGCTACTTTAGGAGCAATTATCTTGTTTACTAAACTGAATACCTTGCTATCTCTTTGATACATTTTTACAAAGCTGAATTAATGGTATAAATTAATCACTTTAGCTTGCAGATCTACGCGTGGCGCGCTGGAACAATCAACCTCT   |
| <b>Primers used to clone pLCE-P2A-Puro</b>                  |                                                                                                                                                                                                                                                                                                                                                                                                       |
| <b>Name</b>                                                 | <b>Sequence</b>                                                                                                                                                                                                                                                                                                                                                                                       |
| <b>3164</b>                                                 | ATCACTCTCGGCATGGACGAGCTGTACAAGGGATCCGGCGCAACAACTT                                                                                                                                                                                                                                                                                                                                                     |
| <b>3158</b>                                                 | CCTCGACGAATTCTCTGGCGGCCGCATATTTACAGGCACCGGGCTTGCGG                                                                                                                                                                                                                                                                                                                                                    |

| <b>Primers used to clone pLC-ZsGreen-P2A-Blast</b>                                                                                   |                                                                                                                                                                                                                                                                                                                                                                                                                                                                                                                                                                                                                                                                     |
|--------------------------------------------------------------------------------------------------------------------------------------|---------------------------------------------------------------------------------------------------------------------------------------------------------------------------------------------------------------------------------------------------------------------------------------------------------------------------------------------------------------------------------------------------------------------------------------------------------------------------------------------------------------------------------------------------------------------------------------------------------------------------------------------------------------------|
| <b>Name</b>                                                                                                                          | <b>Sequence</b>                                                                                                                                                                                                                                                                                                                                                                                                                                                                                                                                                                                                                                                     |
| 3883                                                                                                                                 | ATCCAGTTTGGTTAGTACCGGGCCCGAGAGTTAATTAATTAGTTATTAATAGTAATCA                                                                                                                                                                                                                                                                                                                                                                                                                                                                                                                                                                                                          |
| 3885                                                                                                                                 | CTTGGTCAGGCCGTGCTTGGACTGGGCCATGGTGGCGACCGGTAGCGCTA                                                                                                                                                                                                                                                                                                                                                                                                                                                                                                                                                                                                                  |
| 3887                                                                                                                                 | CGACATCTCCGGCTTGTTCAGCAGAGAGAAGTTTGTTCGCCGGATCCGGGCAAGGCGGAGCCGGAGG                                                                                                                                                                                                                                                                                                                                                                                                                                                                                                                                                                                                 |
| 3888                                                                                                                                 | TCAGATCCGCTAGCGCTACCGGTCGCCACCATGGCCCAGTCCAAGCACGG                                                                                                                                                                                                                                                                                                                                                                                                                                                                                                                                                                                                                  |
| 3910                                                                                                                                 | TCTCTCTGCTGAAACAAGCCGGAGATGTCGAAGAGAATCCTGGACCGGCCAAGCCTTTGTCTCAA                                                                                                                                                                                                                                                                                                                                                                                                                                                                                                                                                                                                   |
| 3911                                                                                                                                 | TACGAAGTTATTAGGTCCTCGACGAATTCTTAGCCCTCCCACACATAAC                                                                                                                                                                                                                                                                                                                                                                                                                                                                                                                                                                                                                   |
| <b>Primers used to clone pLC-CK1<math>\alpha</math>-WT/G40N-P2A-Puro and pLC-CK1<math>\alpha</math>-WT/G40N-P2A-Blast constructs</b> |                                                                                                                                                                                                                                                                                                                                                                                                                                                                                                                                                                                                                                                                     |
| <b>Name</b>                                                                                                                          | <b>Sequence</b>                                                                                                                                                                                                                                                                                                                                                                                                                                                                                                                                                                                                                                                     |
| 3592                                                                                                                                 | GTTTGGTTAGTACCGGGCCCGAGAGGATCCTTAGTTATTAATAGTAATCAA                                                                                                                                                                                                                                                                                                                                                                                                                                                                                                                                                                                                                 |
| 3660                                                                                                                                 | GGAGCCGCTGCTACTCGCCTTATCGTCATCGTCTTTGTAATCCATGGTGGCCGGATCTGA                                                                                                                                                                                                                                                                                                                                                                                                                                                                                                                                                                                                        |
| 3661                                                                                                                                 | TCAGATCCGGCCACCATGGATTACAAAGACGATGACGATAAGGCGAGTAGCAGCGGCTCC                                                                                                                                                                                                                                                                                                                                                                                                                                                                                                                                                                                                        |
| 3734                                                                                                                                 | GAGAGAAGTTTGTTCGCCGGATCCGAAACCTTTCATGTTACTCTTG                                                                                                                                                                                                                                                                                                                                                                                                                                                                                                                                                                                                                      |
| 3595                                                                                                                                 | GCTTCACTGCCACTTCCTCGTTGTTGGTGATGTTGATCGCC                                                                                                                                                                                                                                                                                                                                                                                                                                                                                                                                                                                                                           |
| 3596                                                                                                                                 | GGCGATCAACATCACCAACAACGAGGAAGTGGCAGTGAAGC                                                                                                                                                                                                                                                                                                                                                                                                                                                                                                                                                                                                                           |
| 3971                                                                                                                                 | CGTCAGATCCGCTAGCGCTACCGGTCGCCACCATGGATTACAAAGAC                                                                                                                                                                                                                                                                                                                                                                                                                                                                                                                                                                                                                     |
| <b>Primers used to clone pCW-MCS-Puro</b>                                                                                            |                                                                                                                                                                                                                                                                                                                                                                                                                                                                                                                                                                                                                                                                     |
| <b>Name</b>                                                                                                                          | <b>Sequence</b>                                                                                                                                                                                                                                                                                                                                                                                                                                                                                                                                                                                                                                                     |
| 3035<br>gBlock                                                                                                                       | ACCGTCAGATCGCCTGGAGAATTGGCTAGCAGCGGATCCGACACCGGTGCAGTCGACACCGGAATTC AACCTTAATTAACGACGCGTAGCG<br>GATCCGGGGTTGGGGTTGCGCCTTTTCCAAGGCAGCCCTGGGTTTGCAGAGGGACGCGGCTGCTCTGGGCGTGGTTCCGGGAAACGCAG<br>CGGCGCCGACCCTGGGTCTCGCACATTCTTCACGTCCGTTTCGACGCGTACCCGGATCTTCGCCGCTACCCTTGTTGGGCCCGCCCGGCGAC<br>GCTTCCTGCTCCGCCCTAAGTCGGGAAGGTTCTTTCGCGGTTTCGCGGCGTGCAGGACGTGACAAACGGAAGCCGCACGTCTCACTAGTAC<br>CCTCGCAGACGGACAGCGCCAGGGAGCAATGGCAGCGCGCCGACCGCGATGGGCTGTGGCCAATAGCGGCTGCTCAGCAGGGCGCGCC<br>GAGAGCAGCGGCCGGGAAGGGGCGGTGCGGGAGGCGGGGTGTGGGGCGGTAGTGTGGGCCCTGTTCTGCCCGCGCGGTGTTCCGCAT<br>TCTGCAAGCCTCCGGAGCGCACGTCCGGCAGTCGGCTCCCTCGTTGACCGAATCACCGACCTCTCTCCCAGCAATTCACC |
| 3224                                                                                                                                 | TTGGCTAGCGACACCGGTGCAGTCGACACCGGAATTC AACCTTAATTAACGACGCGTCCGGGTTGGGGTTGCGCC                                                                                                                                                                                                                                                                                                                                                                                                                                                                                                                                                                                        |
| 3225                                                                                                                                 | CCAGTCTAGACATCGGTCCAGGATTCTCTTCGACATCTCCGGCTTGTTCAGCAGAGAGAAGTTTGTTCGCCGGATCCGGTGGTCCTGCA<br>GGGAATTGCTGGGGAGAGAG                                                                                                                                                                                                                                                                                                                                                                                                                                                                                                                                                   |
| 2402                                                                                                                                 | CGACCTCTCTCCCAGCAATTCCTGCAGGGCCACCATGACCGAGTACAAGCCCAC                                                                                                                                                                                                                                                                                                                                                                                                                                                                                                                                                                                                              |
| 3309                                                                                                                                 | CAGCAGAGAGAAGTTTGTTCGCCGGATCCGGCACCGGGCTTGC GGTC                                                                                                                                                                                                                                                                                                                                                                                                                                                                                                                                                                                                                    |

| <b>Codon Altered IRF4 sequence</b>         |                                                                                                                                                                                                                                                                                                                                                                                                                                                                                                                                                                                                                                                                                                                                                                                                                                                                                                                                                                                                                                                                                                                                                                                                                                                                                                                                                                                                                                                                    |
|--------------------------------------------|--------------------------------------------------------------------------------------------------------------------------------------------------------------------------------------------------------------------------------------------------------------------------------------------------------------------------------------------------------------------------------------------------------------------------------------------------------------------------------------------------------------------------------------------------------------------------------------------------------------------------------------------------------------------------------------------------------------------------------------------------------------------------------------------------------------------------------------------------------------------------------------------------------------------------------------------------------------------------------------------------------------------------------------------------------------------------------------------------------------------------------------------------------------------------------------------------------------------------------------------------------------------------------------------------------------------------------------------------------------------------------------------------------------------------------------------------------------------|
| <b>Name</b>                                | <b>Sequence</b>                                                                                                                                                                                                                                                                                                                                                                                                                                                                                                                                                                                                                                                                                                                                                                                                                                                                                                                                                                                                                                                                                                                                                                                                                                                                                                                                                                                                                                                    |
| <b>IRF4_gBL<br/>OCK</b>                    | ATGAACCTGGAGGGCGGCGGCCGAGGCGGAGAGTTCGGCATGAGCGCGGTGAGCTGCGGCAACGGGAAGCTCCGCCAGTGGCTGATCG<br>ACCAGATCGACAGCGGCAAGTACCCCGGGCTGGTGTGGGAGAACGAGGAGAAGAGCATCTTCCGCATCCCCTGGAAGCACGCGGGTAAAC<br>AAGATTATAATCGTGAAGAGGACGCCGCGCTCTTCAAGGCTTGGGCACTGTTTAAAGGAAAGTTCCGAGAAGGCATCGACAAGCCGGACCC<br>TCCCACCTGGAAGACGCGCCTGCGGTGCGCTTTGAACAAGAGCAATGACTTTGAGGAACTGGTTGAGCGGAGCCAGCTGGACATCTCAGAC<br>CCGTACAAAGTGTACAGGATTGTTCTGAGGGAGCCAAAAAAGGAGCCAAGCAGCTCACCTGGAGGACCCGCAGATGTCCATGAGCCACC<br>CCTACACCATGACAACGCCTTACCCTTCGCTCCCAGCCCAGCAGGTTACAACACTACATGATGCCACCCCTCGACCCGAAGCTGGAGGGACTA<br>CGTCCCGGATCAGCCACACCCGGAAATCCCGTACCAATGTCCCATGACGTTTGGACCCCGCGGCCACCACTGGCAAGGCCAGCTTGTGA<br>AAATGGTTGCCAGGTGACAGGAACCTTTTATGCTTGTGCCCCACCTGAGTCCCAGGCTCCCGGAGTCCCCACAGAGCCAAGCATAAGGTCT<br>GCCGAAGCCTTGGCGTTCTCAGACTGCCGGCTGCACATCTGCCTGTACTACCGGGAAATCCTCGTGAAGGAGCTGACCACGTCCAGCCCC<br>GAGGGCTGCCGGATCTCCCATGGACATACGTATGACGCCAGCAACCTGGACCAGGTCCTGTTCCCCTACCCAGAGGACAATGGCCAGAGG<br>AAAAACATTGAGAAGCTGCTGAGCCACCTGGAGAGGGGGCGTGGTCCTCTGGATGGCCCCCGACGGGCTCTATGCGAAAAGACTGTGCCAG<br>AGCAGGATCTACTGGGACGGGCCCTGGCGCTGTGCAACGACCGGCCAACAAACTGGAGAGAGACCAGACCTGCAAGCTCTTTGACACA<br>CAGCAGTTCTTGTGAGAGCTGCAAGCGTTTGTCTACCACGGCCGCTCCCTGCCAAGATTCCAGGTGACTCTATGCTTTGGAGAGGAGTTTCC<br>AGACCCCTCAGAGGCAAAGAAAGCTCATCACAGCTCACGTAGAACCTCTGCTAGCCAGACAACCTATATTATTTGCTCAACAAAACAGTGGACA<br>TTTCCTGAGGGGCTACGATTTACCAGAACACATCAGCAATCCAGAAGATTACCACAGATCTATCCGCCATTCTCTATTCAAGAATGA |
| <b>Primers used to clone pCW-IRF4-Puro</b> |                                                                                                                                                                                                                                                                                                                                                                                                                                                                                                                                                                                                                                                                                                                                                                                                                                                                                                                                                                                                                                                                                                                                                                                                                                                                                                                                                                                                                                                                    |
| <b>Name</b>                                | <b>Sequence</b>                                                                                                                                                                                                                                                                                                                                                                                                                                                                                                                                                                                                                                                                                                                                                                                                                                                                                                                                                                                                                                                                                                                                                                                                                                                                                                                                                                                                                                                    |
| <b>3672</b>                                | ACCGTCAGATCGCCTGGAGAATTGGGCCGCCACCATGAACCTGGAGGGCGGCGG                                                                                                                                                                                                                                                                                                                                                                                                                                                                                                                                                                                                                                                                                                                                                                                                                                                                                                                                                                                                                                                                                                                                                                                                                                                                                                                                                                                                             |
| <b>3673</b>                                | GTGTCGACTGCACCGGTGTCGCTAGTCATTCTTGAATAGAGGAATGGC                                                                                                                                                                                                                                                                                                                                                                                                                                                                                                                                                                                                                                                                                                                                                                                                                                                                                                                                                                                                                                                                                                                                                                                                                                                                                                                                                                                                                   |

**Table S2. Primers and dsDNA fragments used in this study.**

| ID  | Gene  | Target Region | Target Sequence        | Hairpin Sequence                                                                                           |
|-----|-------|---------------|------------------------|------------------------------------------------------------------------------------------------------------|
| sh1 | IKZF1 | CDS           | AGCTACGAGAAGGAGAACGAAA | TGCTGTTGACAGTGAGCGCGCTACGAGAAGGAGAA<br>CGAAATAGTGAAGCCACAGATGTATTTTCGTTCTCCT<br>TCTCGTAGCTTGCCTACTGCCTCGGA |
| sh2 | IKZF1 | CDS           | CGCAGCGGTCTCATCTACCTGA | TGCTGTTGACAGTGAGCGAGCAGCGGTCTCATCTA<br>CCTGATAGTGAAGCCACAGATGTATCAGGTAGATG<br>AGACCGCTGCGTGCCTACTGCCTCGGA  |
| sh1 | IKZF3 | CDS           | GAAATCCCTTACAGCTATTCAA | TGCTGTTGACAGTGAGCGAAAATCCCTTACAGCTAT<br>TCAATAGTGAAGCCACAGATGTATTGAATAGCTGTA<br>AGGGATTTCTGCCTACTGCCTCGGA  |
| sh2 | IKZF3 | CDS           | AGAACGCCAGAATCACATCTA  | TGCTGTTGACAGTGAGCGCGAACGCCAGAATCACA<br>TCTAATAGTGAAGCCACAGATGTATTAGATGTGATT<br>CTGGCGTTCTTGCCTACTGCCTCGGA  |

**Table S3. shRNA sequences used in this study.**

| <b>Antibody</b>               | <b>Vendor</b>  | <b>Catalog #</b> | <b>Dilution used</b> | <b>Blocking agent</b>                                          | <b>Primary Antibody Diluted In</b>                          |
|-------------------------------|----------------|------------------|----------------------|----------------------------------------------------------------|-------------------------------------------------------------|
| <b>IKZF1</b>                  | Santa Cruz     | sc-13039         | 1:1000               | 5% milk in 1X TBS                                              | 5% milk in 1X TBST                                          |
| <b>IKZF3</b>                  | Cell Signaling | 15103            | 1:1000               | 5% milk in 1X TBS                                              | 5% milk in 1X TBST                                          |
| <b>IRF4</b>                   | Cell Signaling | 15106            | 1:1000               | 5% milk in 1X TBS                                              | 5% milk in 1X TBST                                          |
| <b>MYC</b>                    | Cell Signaling | 13987            | 1:1000               | 5% milk in 1X TBS                                              | 5% milk in 1X TBST                                          |
| <b>GAPDH</b>                  | Cell Signaling | 2118             | 1:5000               | 5% milk in 1X TBS                                              | 5% milk in 1X TBST                                          |
| <b>Flag</b>                   | Sigma Aldrich  | F1804            | 1:2000               | 5% milk in 1X TBS                                              | 5% milk in 1X TBST                                          |
| <b>CRBN</b>                   | Sigma Aldrich  | HPA045910        | 1:1000               | 5% milk in 1X TBS                                              | 5% milk in 1X TBST                                          |
| <b>ZFP91</b>                  | Bethyl         | A303-245A        | 1:1000               | 5% milk in 1X TBS                                              | 5% milk in 1X TBST                                          |
| <b>CK1<math>\alpha</math></b> | Bethyl         | A301-991A        | 1:1000               | Odyssey Blocking buffer<br>( LICOR Biosciences cat# 927-50100) | Odyssey Blocking buffer ( LICOR Biosciences cat# 927-50100) |

**Table S4. Antibodies used in this study.**
